# Supplementary material for: Interfacial engineering of a tri-phase CoFe/CoFeOx/Co–Fe3O4electrocatalyst for promoting the oxygen evolution reaction
Source: Royal Society of Chemistry journal article supplement (doi:10.1039/d2nj03739d), 2022-01-01
Supplement: d2nj03739d1.pdf [file d2nj03739d1.pdf]

## Supporting information

# Interfacial engineering of a tri-phase CoFe/CoFeO<sub>x</sub>/Co-Fe<sub>3</sub>O<sub>4</sub> electrocatalyst for promoting oxygen evolution reaction

Chao Lei,<sup>ab</sup> Jingjuan Chen,<sup>ab</sup> Lin Lv,<sup>\*ab</sup> Houzhao Wan,<sup>ab</sup> Wenfeng Wang,<sup>ab</sup> Jun Zhang,<sup>ab</sup> Hanbin Wang,<sup>ab</sup> Chundong Wang,<sup>c</sup> and Hao Wang<sup>\*ab</sup>

<sup>a</sup> Hubei Yangtze Memory Laboratories, Wuhan 430205, PR China.

<sup>b</sup> Faculty of Physics and Electronic Science and School of Microelectronics, Hubei University, Wuhan, 430062, PR China.

<sup>c</sup> School of Optical and Electronic Information, Wuhan National Laboratory for Optoelectronics, Optics Valley Laboratory, Huazhong University of Science and Technology, Wuhan 430074, PR China.

---

\* Corresponding authors.

E-mail addresses: estlvlin@hubu.edu.cn (L. Lv); nanoguy@126.com, wangh@hubu.edu.cn (H. Wang).

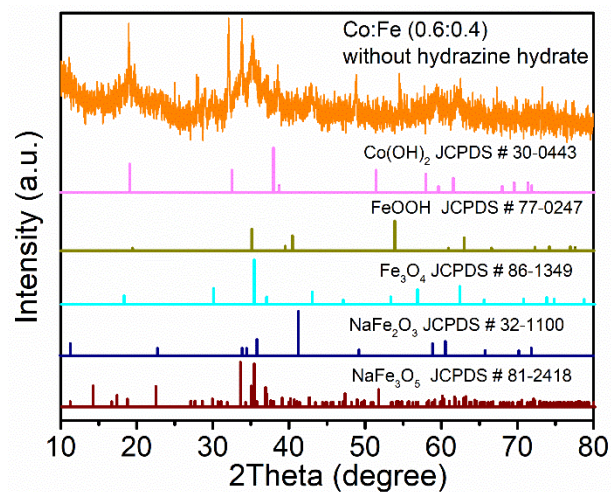

Fig. S1 The XRD pattern of the sample synthesized without hydrazine hydrate.

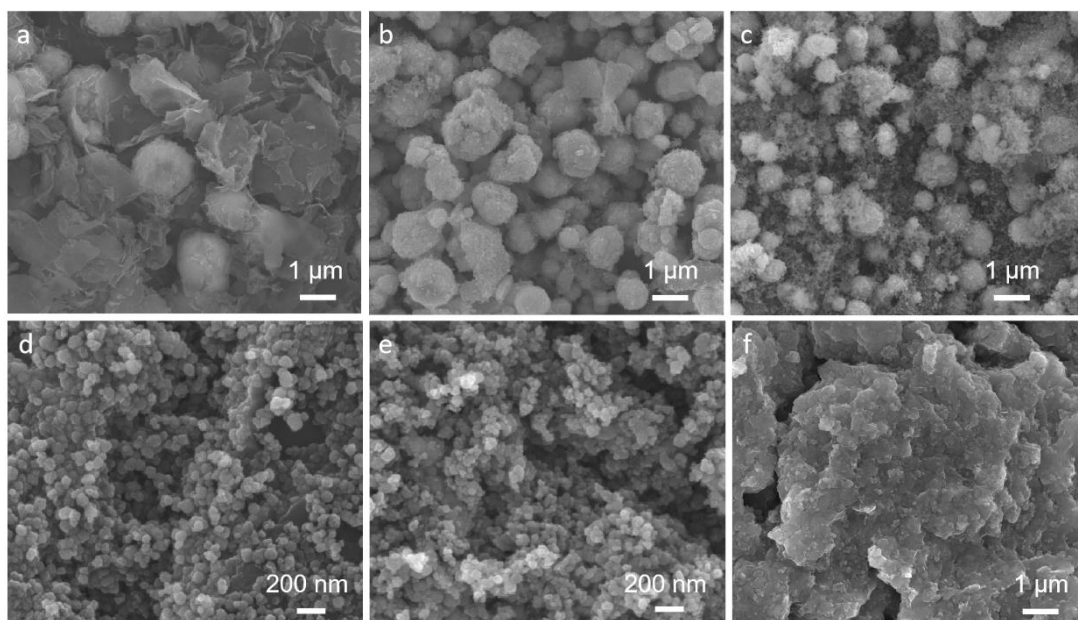

Fig. S2 FESEM images of the samples with different Co/Fe atom ratios: (a) 1:0, (b) 0.8:0.2, (c) 0.6:0.4, (d) 0.4:0.6, (e) 0.2:0.8, (f) 0:1.

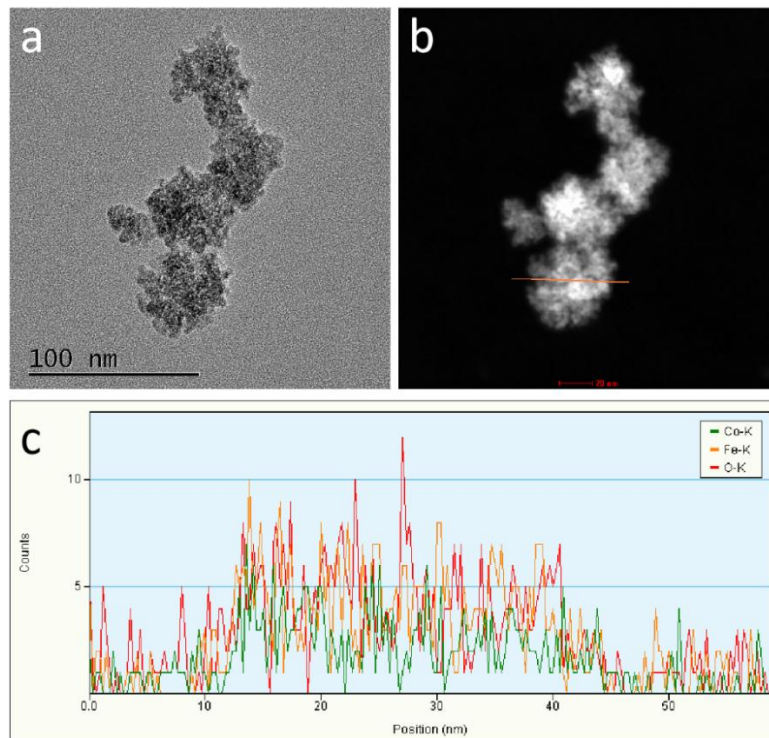

Fig. S3 (a) a typical TEM of the surrounded Co-Fe<sub>3</sub>O<sub>4</sub> nanoparticles in CoFe/CoFeO<sub>x</sub>/Co-Fe<sub>3</sub>O<sub>4</sub> (0.4: 0.6), (b) HAADF-STEM image of the nanoparticles, and (c) the line-scan profile across the nanoparticles.

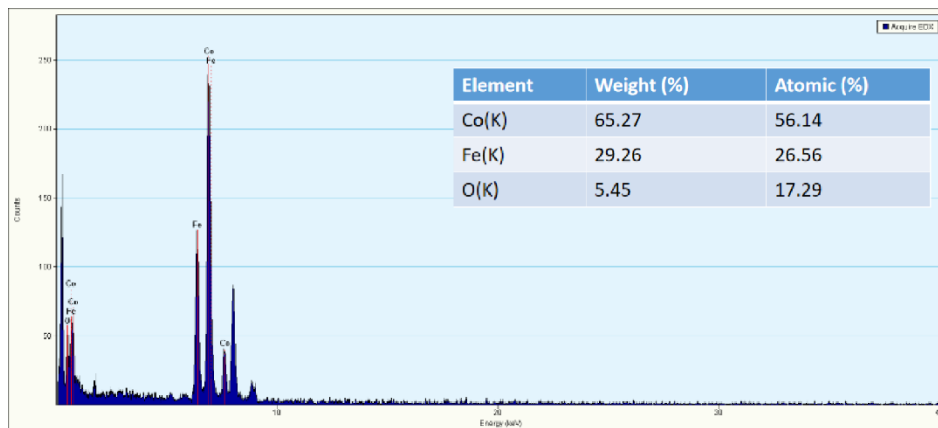

Fig. S4 EDS-TEM spectrum of the CoFe/CoFeO<sub>x</sub>/Co-Fe<sub>3</sub>O<sub>4</sub>.

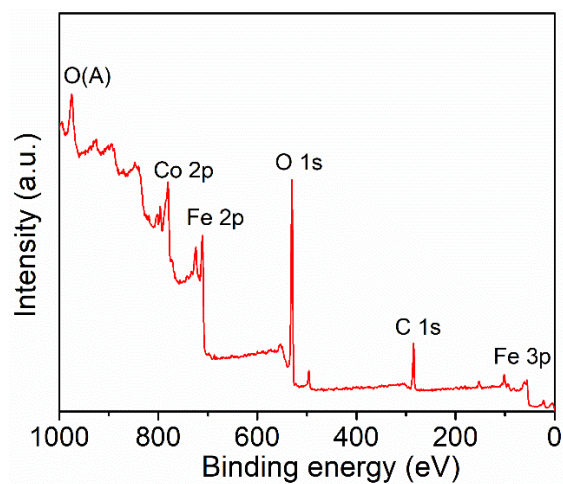

Fig. S5 XPS survey spectrum of the CoFe/CoFeO<sub>x</sub>/Co-Fe<sub>3</sub>O<sub>4</sub>.

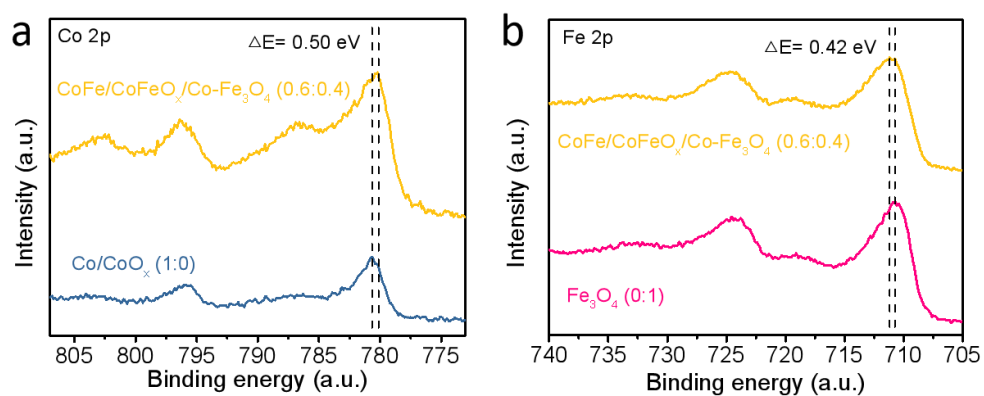

Fig. S6 XPS core level spectra of (a) the Co 2p and (b) the Fe 2p for different catalysts.

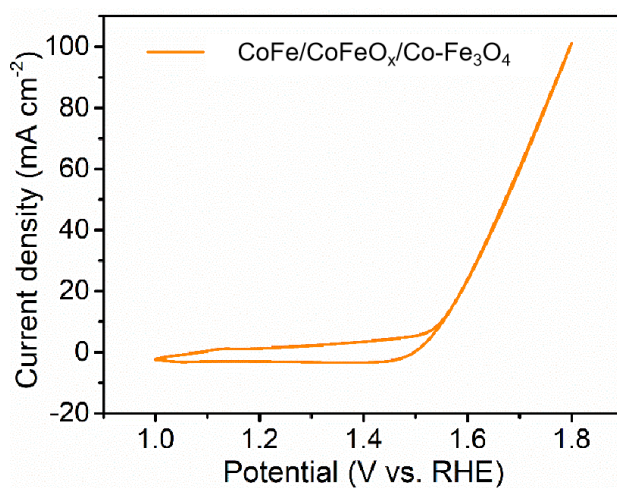

Fig. S7 CV curve of the CoFe/CoFeO<sub>x</sub>/Co-Fe<sub>3</sub>O<sub>4</sub> (0.6:0.4) at a scan rate of 50 mV s<sup>-1</sup>.

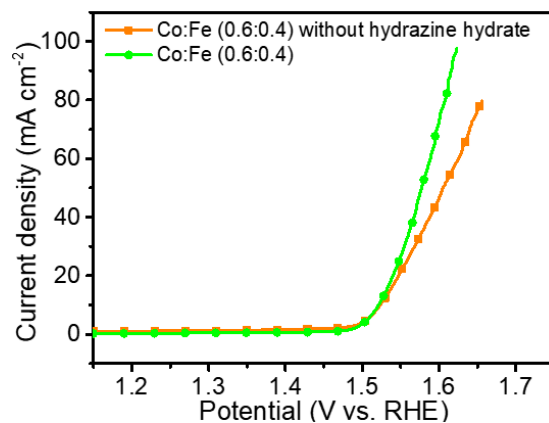

Fig. S8 The LSV curve of the sample synthesized without hydrazine hydrate.

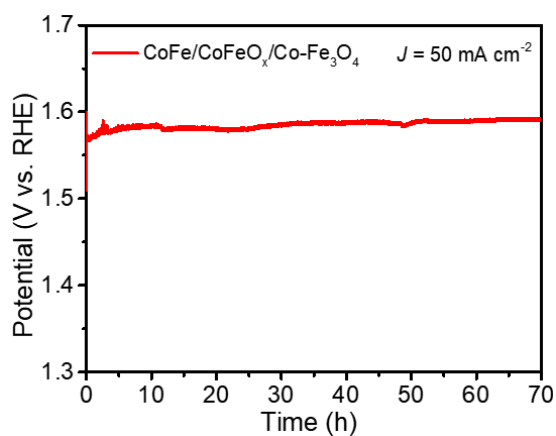

Fig. S9 The stability test of the CoFe/CoFeO<sub>x</sub>/Co-Fe<sub>3</sub>O<sub>4</sub> (0.6:0.4) for a long-term electrolysis of 70 h at 50 mA cm<sup>-2</sup>.

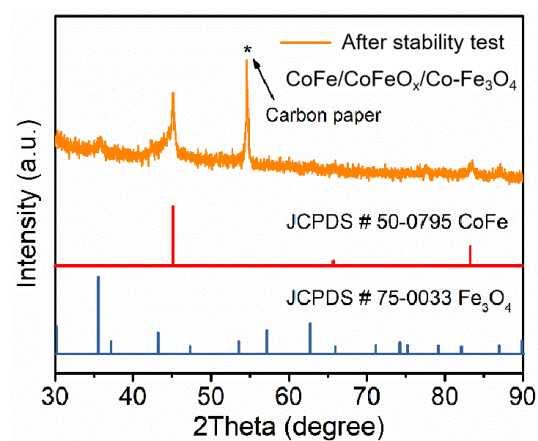

Fig. S10 XRD pattern of the spent CoFe/CoFeO<sub>x</sub>/Co-Fe<sub>3</sub>O<sub>4</sub> (0.6:0.4).

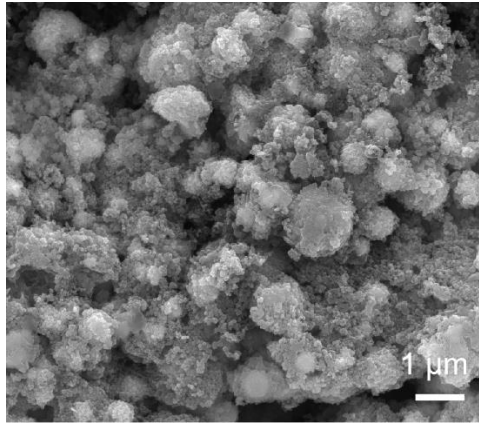

Fig. S11 FESEM image of the spent CoFe/CoFeO<sub>x</sub>/Co-Fe<sub>3</sub>O<sub>4</sub> (0.6:0.4).

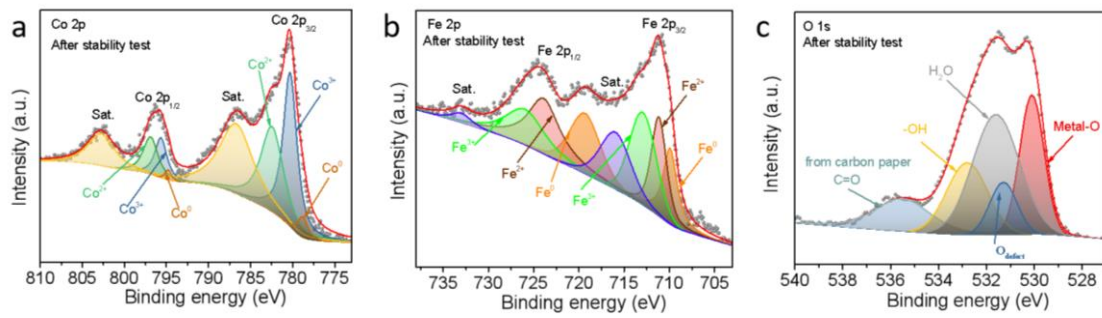

Fig. S12 XPS spectra of the spent CoFe/CoFeO<sub>x</sub>/Co-Fe<sub>3</sub>O<sub>4</sub> (0.6:0.4).

Table S1 OER performance comparison of recently reported CoFe-based electrocatalysts.

| Catalysts                                                                  | Overpotential<br>(mV)<br>@ 10 mA cm <sup>-2</sup> | Tafel slope<br>(mV dec <sup>-1</sup> ) | Electrolyte    | Substrate               | Year<br>published | Ref.                 |
|----------------------------------------------------------------------------|---------------------------------------------------|----------------------------------------|----------------|-------------------------|-------------------|----------------------|
| CoFeV hydroxide                                                            | 376                                               | 26                                     | 1 M KOH        | Glassy<br>carbon        | 2021              | 1                    |
| CoFe alloy/N-doped<br>carbon                                               | 340                                               | 77                                     | 1 M KOH        | Glassy<br>carbon        | 2022              | 2                    |
| La-doped CoFe layered<br>double hydroxide                                  | 317                                               | 125                                    | 1 M KOH        | Glassy<br>carbon        | 2021              | 3                    |
| CoFe <sub>2</sub> O <sub>4</sub> /carbon<br>nanotube                       | 390                                               | 82                                     | 0.1 M KOH      | Glassy<br>carbon        | 2021              | 4                    |
| Se-doped Co-Fe sulfide                                                     | 281                                               | 51.8                                   | 1 M KOH        | Glassy<br>carbon        | 2021              | 5                    |
| CoFe alloy/N-doped<br>carbon nanosheets                                    | 285                                               | 39                                     | 1 M KOH        | Glassy<br>carbon        | 2021              | 6                    |
| CoFe/S, N co-doped<br>carbon nanotubes                                     | 358                                               | 259                                    | 0.1 M KOH      | Glassy<br>carbon        | 2021              | 7                    |
| N-doped CoFe phosphate                                                     | 313                                               | 58.92                                  | 1 M KOH        | Glassy<br>carbon        | 2021              | 8                    |
| Mesoporous Co-Fe<br>oxides                                                 | 280                                               | 68                                     | 1 M KOH        | Glassy<br>carbon        | 2021              | 9                    |
| Co <sub>3</sub> Fe <sub>1</sub> -layered double<br>hydroxides              | 314                                               | 79.4                                   | 1 M KOH        | Glassy<br>carbon        | 2022              | 10                   |
| <b>Tri-phase<br/>CoFe/CoFeO<sub>x</sub>/Co-Fe<sub>3</sub>O<sub>4</sub></b> | <b>291</b>                                        | <b>47.8</b>                            | <b>1 M KOH</b> | <b>Carbon<br/>paper</b> | <b>–</b>          | <b>This<br/>work</b> |

## References

- 1 W. Adamson, C. Jia, Y. Li and C. Zhao, *Int. J. Hydrogen Energy*, 2021, **46**, 35230-35238.
- 2 G. A. Gebreslase, M. V. Martínez-Huerta, D. Sebastián and M. J. Lázaro, *J. Colloid Interface Sci.*, 2022, **625**, 70-82.
- 3 M. Rong, H. Zhong, S. Wang, X. Ma and Z. Cao, *Colloids Surf., A*, 2021, **625**, 126896.
- 4 Q. Huang, C. Li, Y. Tu, Y. Jiang, P. Mei and X. Yan, *Ceram. Int.*, 2021, **47**, 1602-1608.
- 5 Y. Song, X. Zhao and Z.-H. Liu, *Electrochim. Acta*, 2021, **374**, 137962.
- 6 S. Wang, H. Wang, C. Huang, P. Ye, X. Luo, J. Ning, Y. Zhong and Y. Hu, *Appl. Catal., B*, 2021, **298**, 120512.
- 7 G. Li, Y. Tang, T. Fu, Y. Xiang, Z. Xiong, Y. Si, C. Guo and Z. Jiang, *Chem. Eng. J.*, 2022, **429**, 132174.
- 8 D.-S. Pan, P. Chen, L.-L. Zhou, J.-H. Liu, Z.-H. Guo and J.-L. Song, *J. Power Sources*, 2021, **498**, 229859.
- 9 T. Tang, Q. Zhang, X. Bai, Z. Wang and J. Guan, *Chem. Commun.*, 2021, **57**, 11843-11846.
- 10 Y. Zhang, C. Gan, Q. Jiang, P. Lang, W. Wang and J. Tang, *Mater. Sci. Eng. B*, 2022, **282**, 115800.
